# Supplementary material for: Comprehensive Genomic Discovery of Non-Coding Transcriptional Enhancers in the African Malaria Vector Anopheles coluzzii
Source: Front Genet. 2022 Jan 10;12:785934. doi: 10.3389/fgene.2021.785934 (PMC8784733; doi:10.3389/fgene.2021.785934)
Supplement: Supplementary file 5 [file Table3.XLSX]

## Sheet: Discovered Motifs
Supplementary Table 3. Motif Discovery within STARR-seq candidate enhancers identifies de novo motifs (highlighted in gray) and characterized motifs from Drosophila melanogaster
						Drosophila Transcription Factors known to bind to Discovered Motifs
Discovered Motif ID	Discovered Motif*	brk	btd	Clamp	CTCF	Deaf1	Eip74EF	Ets21C	gcm2	h	Mad	Optix	pho	sv	Trl	twi	Others
STREME-1	ACCGGAAGY						X	X
STREME-2	YCTTATCR
STREME-3	CGTCSTCSB
STREME-4	VCAKATGGYGCD				X								X			X	sna,hkb
STREME-5	CGCGCTTC		X	X						X				X	X
STREME-6	ABCAGCG
STREME-7	CGBVCG
STREME-8	CGCACACAHAC
STREME-9	GGMGGAAG						X	X
STREME-10	GCGACCG			X							X						odd,M1BP
STREME-11	CGAGCAGCAG																odd
STREME-12	CGCCGSCC	X	X		X						X		X				hkb,pan
STREME-13	CGCGATCGCG			X	X						X
STREME-14	SGNCCGGNCS		X			X	X	X		X	X		X				sna,M1BP,pan,vfl
STREME-15	CAGCAGCAGCA	X			X						X						odd
STREME-16	CGGAAACGS						X	X									Su(h), Stat92E
STREME-17	CGGCACGA
STREME-18	GCTGATAA											X
STREME-19	BGCGATA					X						X					pnr,BEAF-32,Dref,so,cad
STREME-20	CAGCGCAA
STREME-21	CACCACCATC																schlank
STREME-22	CGCGCAC		X	X					X	X							hkb
STREME-23	ACTTGGACACGGC
STREME-24	GCSCGG		X							X			X				opa
STREME-25	CTCGATC			X													pnr,BEAF-32,Dref
STREME-26	GGAAGAGA														X
STREME-27	CACWTCCG						X	X
STREME-28	CACAAAAGTG
STREME-29	AATCGGTACA
STREME-30	CGCTCCGC
STREME-31	CGACRC
STREME-32	GCGGCAC	X			X					X	X		X	X			usp,cnc::maf-S
STREME-33	GCCCGC	X	X	X					X	X			X				hkb,M1BP,opa,usp
STREME-34	AGAAGTAGAAC
STREME-35	CTCAGAAGACC
STREME-36	AACAATGTTACGCTC																dmrt99B
* Non A, T, G, C basepairs use ambiguous base codes
