# Supplementary material for: Comprehensive Genomic Discovery of Non-Coding Transcriptional Enhancers in the African Malaria Vector Anopheles coluzzii
Source: Front Genet. 2022 Jan 10;12:785934. doi: 10.3389/fgene.2021.785934 (PMC8784733; doi:10.3389/fgene.2021.785934)
Supplement: Supplementary file 11 [file Table1.xlsx]

## Sheet: Sheet1
Supplementary Table 1. Primers used in STARR-seq library generation and in amplification of STARR-seq identified enhancers for validation by luciferase assay ( *= phosphorothioate bonds)
Primer Use	Primer Name	Primers 5'-3'
Enrichment PCR with Universal adaptor	Enr_Fwd	TAGAGCATGCACCGGACACTCTTTCCCTACACGACGCTCTTCCGATCT
Enrichment PCR with Index adaptor	Enr_Rev	GGCCGAATTCGTCGACAAGCAGAAGACGGCATACGAGAT
Reverse transcription	RT_Rev	CAAACTCATCAATGTATCTTATCATG
Amplification of reporter cDNA	Report_Fwd	AAGCCACCATGGAAAAG*G*C*C*A*T
Amplification of reporter cDNA	Report_Rev	TATCATGTCTGCTCGAAGC*G*G*
Input control	Cont_Fwd	CTAGGCACACCGAAACGACTAAC
Input control	Cont_Rev	TATCATGTCTGCTCGAAGCGG
EN01	EN01_LEFT	TGTGTAGATGCGCGTGTTAAA
	EN01_RIGHT	AACTTCATTTCCACCGTTCG
EN02	EN02_LEFT	TTTTGCACACCCTGGATAGG
	EN02_RIGHT	CCTTTCGCGCTGTTTGTT
EN03	EN03__LEFT	ACCCACAAGCGGCAGTAA
	EN03__RIGHT	TCTCCCCAGTGCTGATGC
EN04	EN04_LEFT	GATTCGCCAATCTTTTCAACA
	EN04_RIGHT	CGCAATCGCAAAACAAAATA
EN05	EN05_LEFT	GTTTTTGCCGTTCGGTGTAT
	EN05_RIGHT	ATCGAACGCGTATTCTCCTG
EN06	EN06_LEFT	GCGGAGGTTTGCTTAGAGTG
	EN06_RIGHT	CCCTATTGCACGAATTTGCT
EN07	EN07_LEFT	AATGGCCTACGCAGTGATTC
	EN07_RIGHT	GCGTTGCCGAACTAATGTTT
EN08	EN08__LEFT	TCGTTCAAATGAAAGGGATG
	EN08__RIGHT	TGTTACATCGAGCGAAATCAA
EN09	EN09_LEFT	AAATCATCAAGCACCCTTCG
	EN09_RIGHT	GCCAACTACTCCCCCTTGTT
EN10	EN10_LEFT	TGCTGCCAAACATTATCGAA
	EN10_RIGHT	AGCGCATTGATCGTTAAGCA
EN11	EN11_LEFT	CAGCAAACCGATGAAAGATG
	EN11_RIGHT	GCACAATTCGCCGAGGTA
EN12	EN12_LEFT	TGTGTGTGCAGCCGAGTAAT
	EN12_RIGHT	TACCCGTCCGAAAGAAAGTG
EN13	EN13_LEFT	TGTGCTGCGTATTGAAAAGC
	EN13_RIGHT	CAGAGTTGCATAAAATTCCTGAAG
EN14	EN14_LEFT	TTTTTAACCAGCGCGTTCTT
	EN14_RIGHT	GACTGATTGATCCGCAAGTG
EN15	EN15__LEFT	GGGCAAAGAATACCGCATTT
	EN15__RIGHT	TCATACCGCGTGTGATGATT
EN16	EN16_LEFT	CCAGTACGCAAACAGTGTGG
	EN16_RIGHT	GCAAAACTGTAACCGCAAGA
EN17	EN17_LEFT	CAGTCTGGACGTCGGTACAA
	EN17_RIGHT	TGTCATCTGTGACAGCTTTGC
EN18	EN18_LEFT	CGGAAAAATCGAAACAGCTT
	EN18_RIGHT	CCGCTTGCTGTTGTTGTTTA
EN19	EN19_LEFT	TCCAACCCCTATTTCACAGC
	EN19_RIGHT	ACTTTGCCGAAGGTGGTATG
EN20	EN20_LEFT	GTTGCTAATTGCGCTTGTGA
	EN20_RIGHT	TTTACCCCTGCTCTTCATGG
EN21	EN21_LEFT	GGGTCGGGCTTTTTATTGAC
	EN21_RIGHT	GCGGCGATGAGTTAGGAATA
EN22	EN22_LEFT	GCCTCTCCTTGTTCGTACCTT
	EN22_RIGHT	CCGCTCGTCAAGATCTGTAAA
EN23	EN23__LEFT	CCAAAATTTGTCCTTGTCG
	EN23__RIGHT	TTTATTTGTTCGCGATGCAG
EN24	EN24_LEFT	CTCGTCTGAATCGCTCCAA
	EN24_RIGHT	TTGGCCTGTAATGAAATCTGC
EN25	EN25_LEFT	AGGACCTATGCGGTGGTGT
	EN25_RIGHT	ATGGTTTGGCATCCCATC
EN26	EN26_LEFT	GTTCCGGTAATGATCGGTTG
	EN26_RIGHT	CATCCTGCTAATGCCTCGTA
EN27	EN27_LEFT	TTGGCGTCGAGTAAATTGAA
	EN27_RIGHT	GACACTATGGCTTGGCGTTC
EN28	EN28_LEFT	TTCCGTTTTATAACATATCATTGTG
	EN28_RIGHT	GGTCAGTGAAACACATTATTAATAGGC
EN29	EN29_LEFT	TTCCCCATCTTTTCGACAGT
	EN29_RIGHT	TAGGTCTCGGATGGGAATTG
EN30	EN30_LEFT	CACAGCACAGCCACAAGGTG
	EN30_RIGHT	TGCACATAATACTCTTAGCTTGATTTT
EN31	EN31__LEFT	TTGGAAGAGCCAATAGGTTG
	EN31__RIGHT	CCTCCCGGAAATAATGGGTA
EN32	EN32__LEFT	CAGGAGGAATGTTAGATGTCTTAGG
	EN32__RIGHT	GGGGGAAATTACAATCAAGC
EN33	EN33_LEFT	TATTCCCTGCCAACCACACT
	EN33_RIGHT	GTAGTGCCTGGGGTTCTCGT
EN34	EN34_LEFT	TGTAAAACTGCACGCGAATG
	EN34_RIGHT	AGTACGAAGGTACGCGTTGG
EN35	EN35_LEFT	GGAAAAAGACGGTGGGATTA
	EN35_RIGHT	TACACGCGCAGAGAGAAAGA
EN36	EN36_LEFT	TTTTGGGCTGGCTGTAAAAC
	EN36_RIGHT	ATCAGTTTCAGGACCGTTGG
EN37	EN37_LEFT	CGTCTCCATATCCGTGGTTT
	EN37_RIGHT	TGTCTTTGAACAGCACAAAAGG
